# Supplementary material for: Modelling PIP4K2A inhibitory activity of 1,7-naphthyridine analogues using machine learning and molecular docking studies
Source: Royal Society of Chemistry journal article supplement (doi:10.1039/d2ra07382j), 2023-01-01
Supplement: d2ra07382j1.pdf [file d2ra07382j1.pdf]

### Appendix I

Dataset S1: Structure of 1,7-naphthyridine Analogues and Their Corresponding pIC50

| S/N | Structures of 1,7-Naphthyridine Analogs                                             | IC50  |
|-----|-------------------------------------------------------------------------------------|-------|
| 1   | 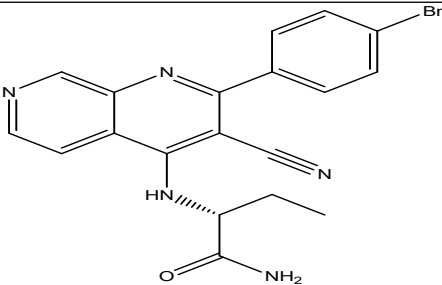   | 0.61  |
| 2   |    | 3.000 |
| 3   |   | 7.45  |
| 4   |  | 0.089 |
| 5   |  | 0.65  |
| 6   |  | 0.82  |

|    |  |       |
|----|--|-------|
| 7  |  | 0.740 |
| 8  |  | 0.490 |
| 9  |  | 0.300 |
| 10 |  | 0.040 |
| 11 |  | 0.030 |

12

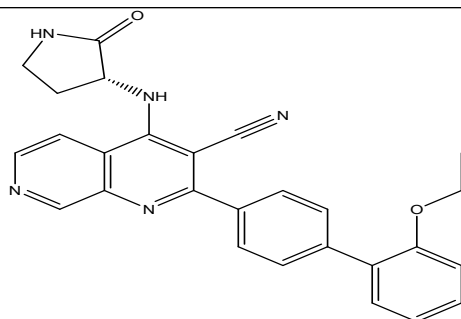

0.560

13

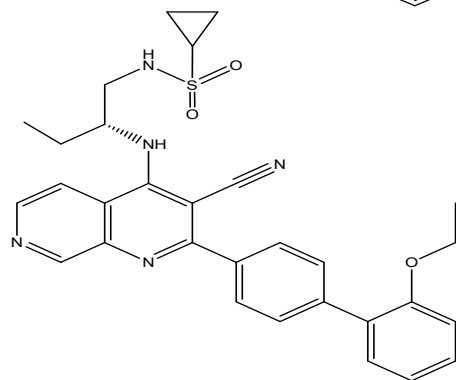

0.910

14

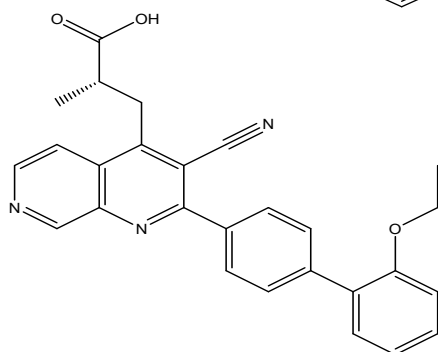

0.200

15

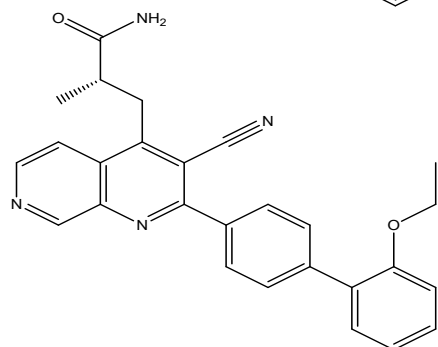

3.240

16

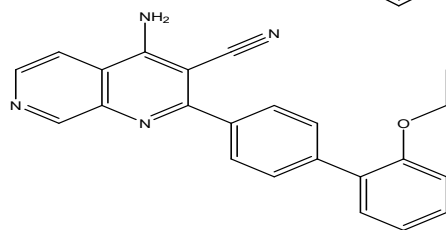

0.63

---

17

10.20

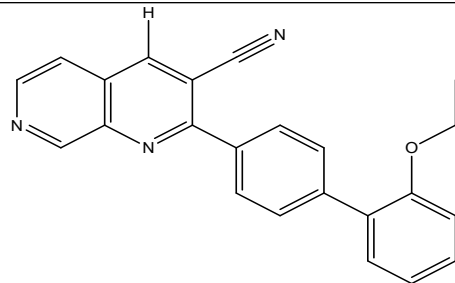

18

0.037

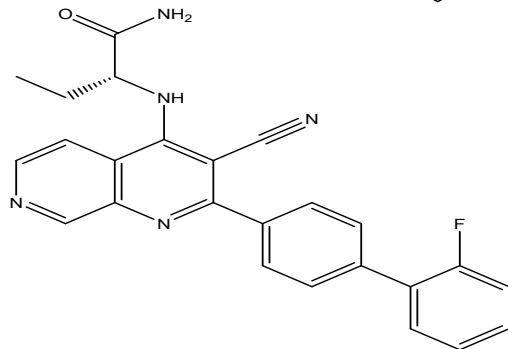

19

0.160

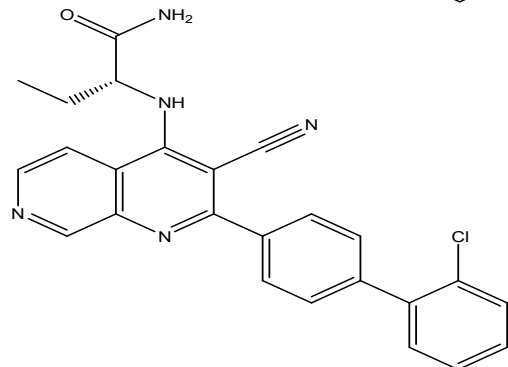

20

0.11

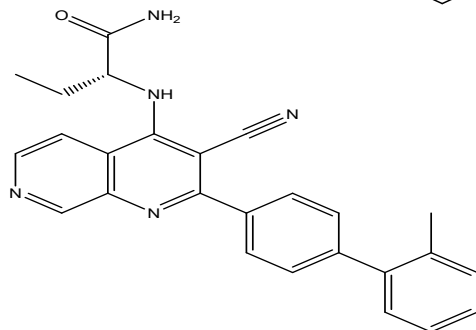

21

0.042

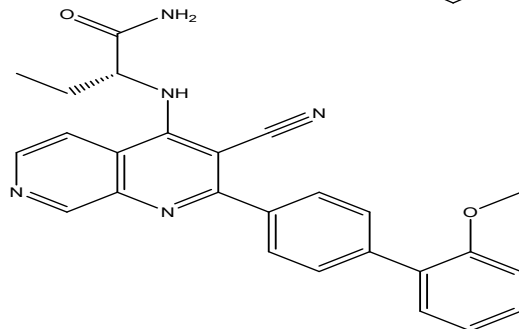

---

22

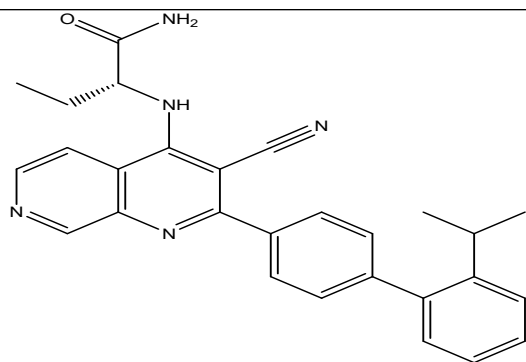

1.520

23

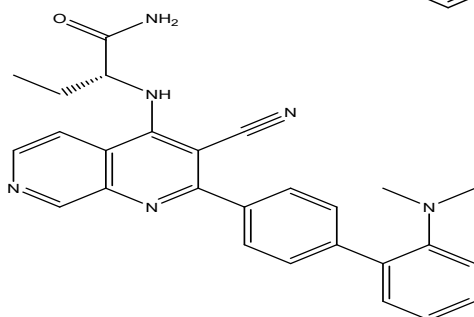

2.480

24

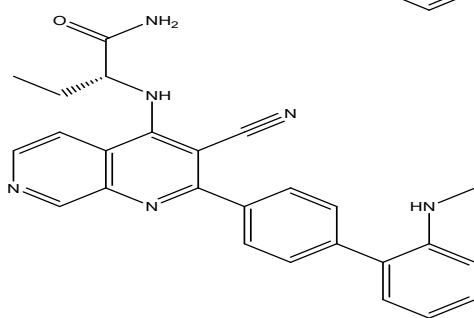

0.240

25

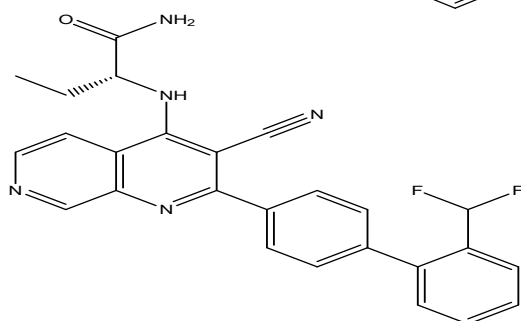

1.92

26

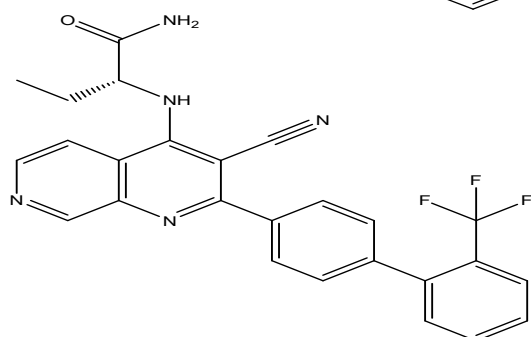

1.02

---

---

27

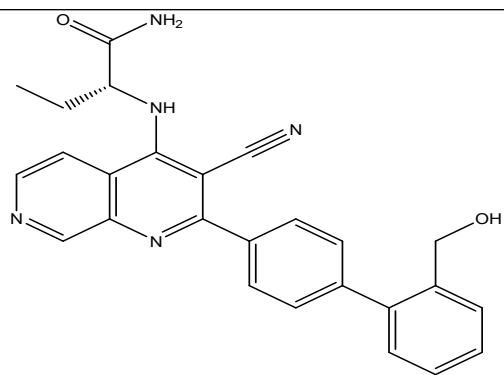

0.52

28

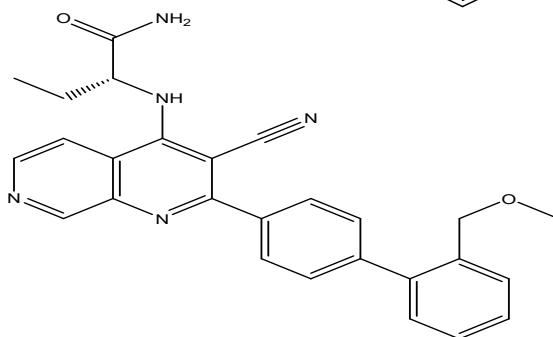

2.19

29

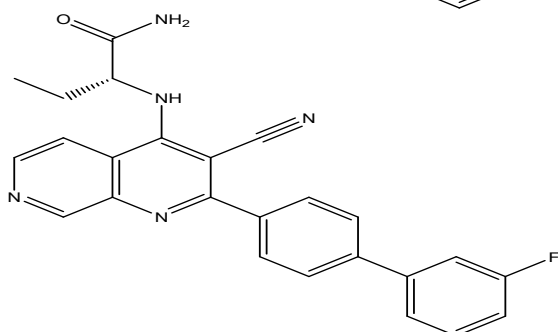

0.18

30

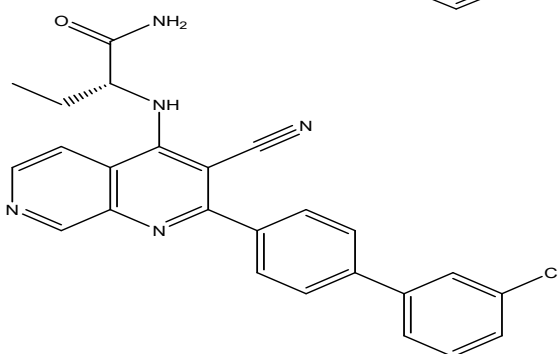

0.074

31

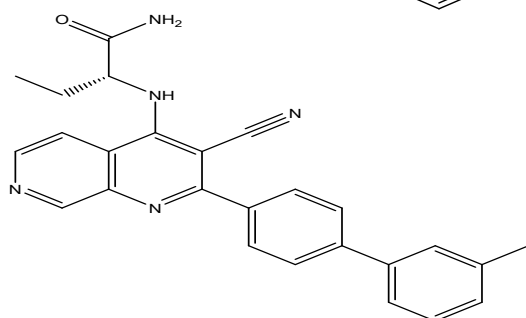

0.061

---

|    |  |       |
|----|--|-------|
| 32 |  | 0.200 |
| 33 |  | 0.284 |
| 34 |  | 0.088 |
| 35 |  | 0.30  |
| 36 |  | 0.66  |

37

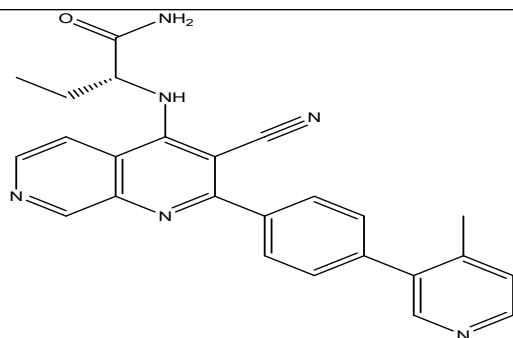

10.2

38

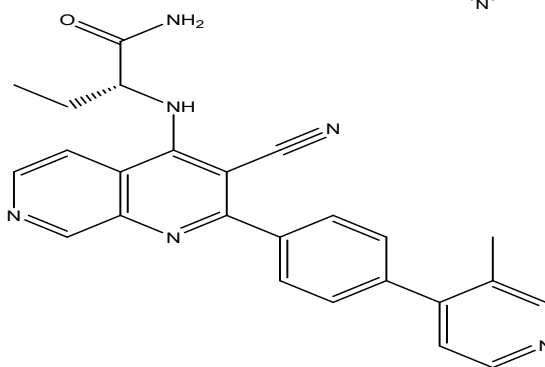

7.34

39

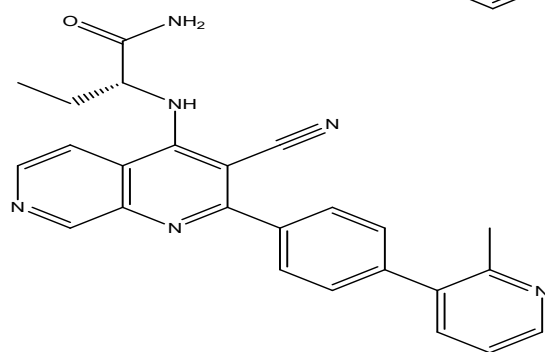

18.0

40

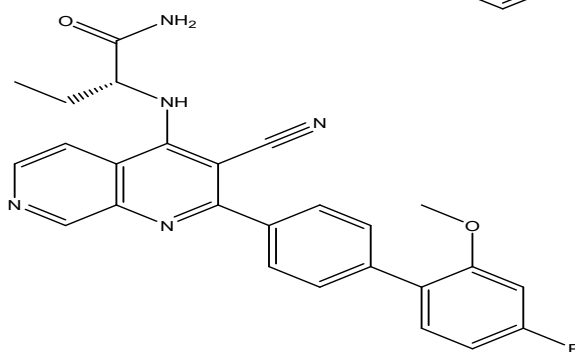

0.047

41

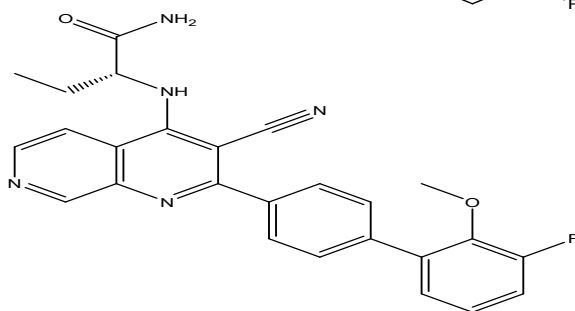

0.32



---

42

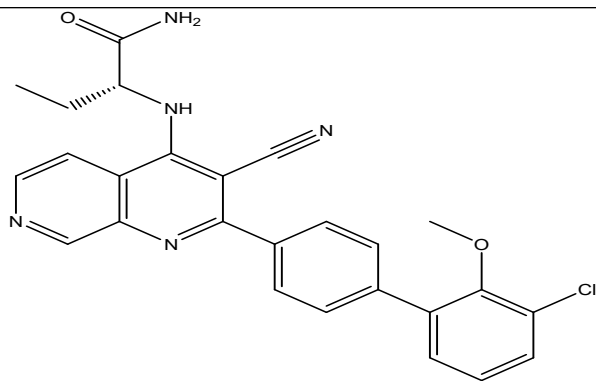

1.04

43

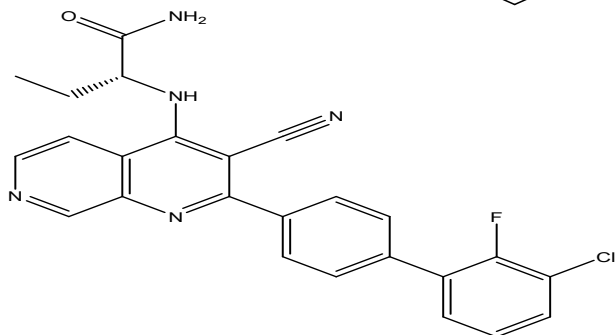

0.013

44

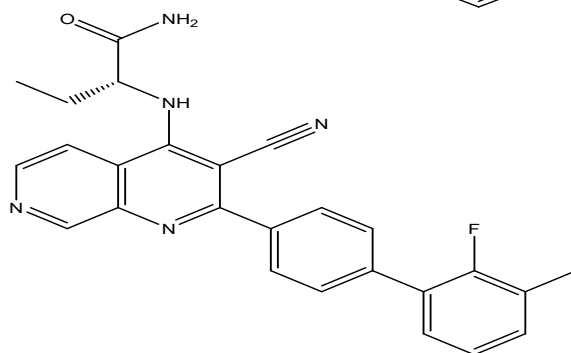

0.019

---

## Appendix II

### ANN and SVM Hyperparameter optimization

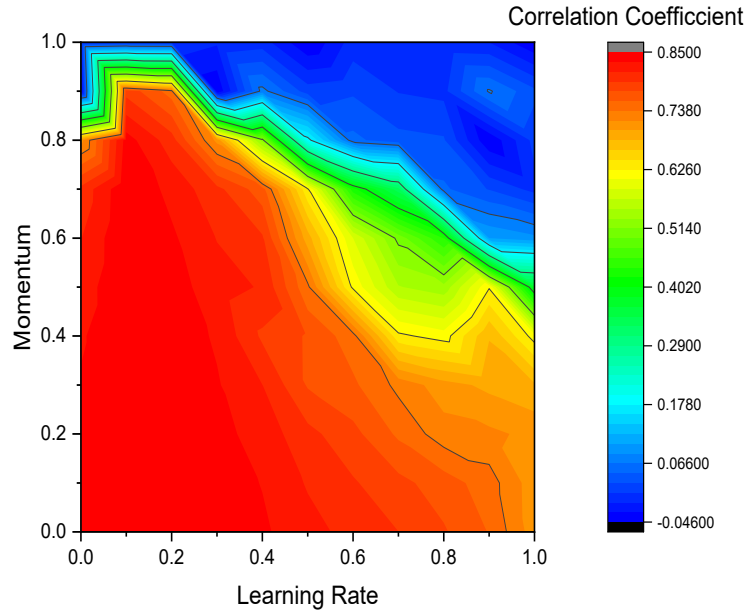

Figure 1: Contour Plot of Optimization of Learning rate and Momentum 2D.

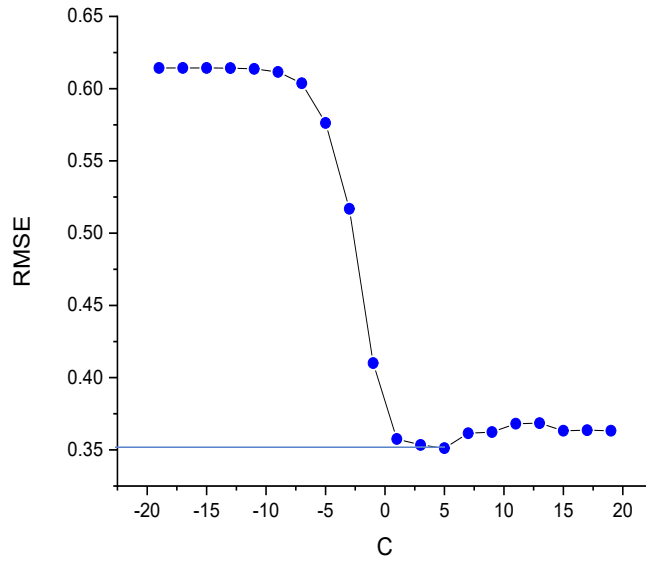

Figure 2: Optimization of Complexity Parameter as a function of RMSE for SVM model development

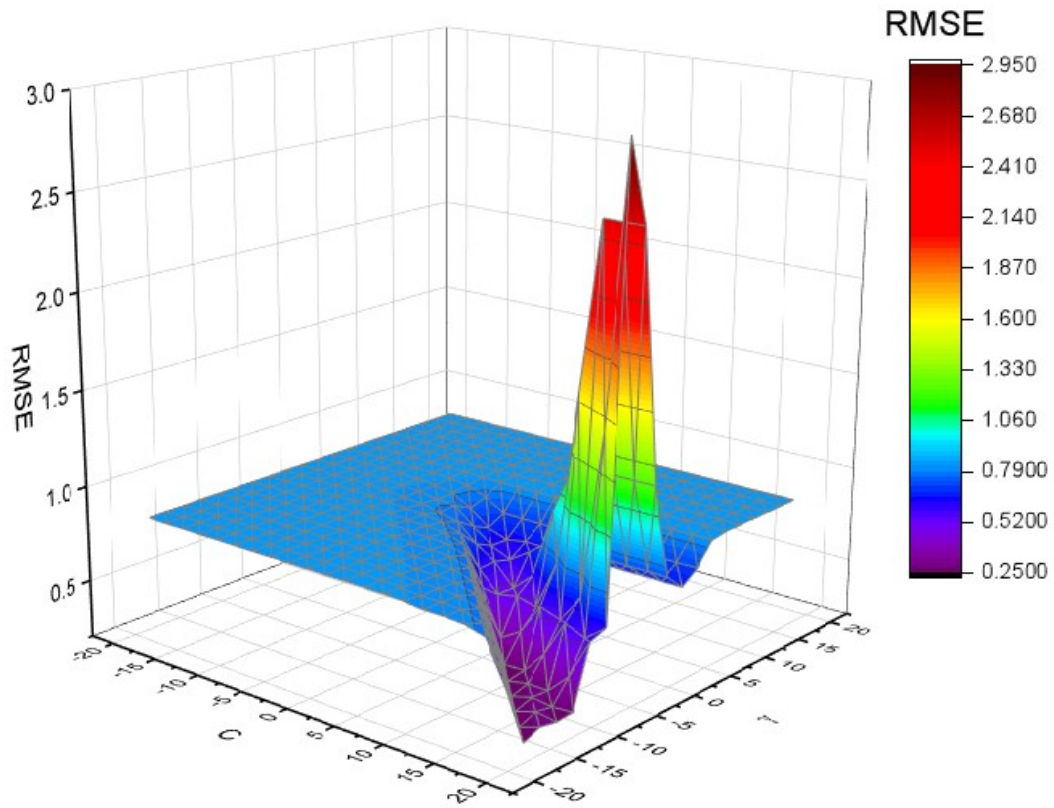

Figure3 : 3D Response Surface Plot for Optimization of Complexity Parameter and Gamma

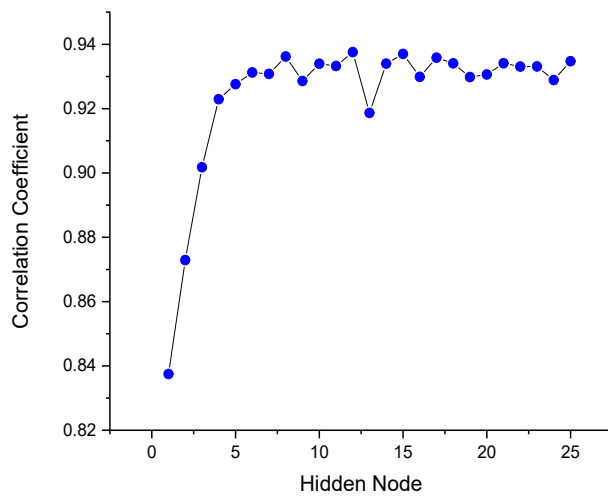

Figure 4: Optimization number of Nodes in the Hidden Layer

Table 1: Summary of Hyperparameter values for Global optimization

| Kernel     | Optimal Parameters |          |      |     |          | Training Set    |                    | LOO-CV Set      |                    |
|------------|--------------------|----------|------|-----|----------|-----------------|--------------------|-----------------|--------------------|
|            | $\sigma$           | $\omega$ | E    | C   | $\gamma$ | R <sub>TR</sub> | RMSE <sub>TR</sub> | Q <sub>CV</sub> | RMSE <sub>CV</sub> |
| Polynomial | --                 | --       | 32.0 | 5.0 | --       | 0.9410          | 0.3518             | 0.6310          | 0.3564             |
| PUK        | 1.0                | 1.0      | --   | --  | --       | 0.9559          | 0.2765             | 0.6653          | 0.5385             |
| RBF        | --                 | --       | --   | 10  | -14      | 0.9737          | 0.2774             | 0.6793          | 0.5045             |

### Appendix III

#### Molecular Descriptors

Table 1: List of Molecular Descriptors

| Compound s | ATSC7p   | MATS8c   | MATS6i   | SpMin2_Bh v | SpMin5_Bh e | SpMax8_Bh i | Kier3    |
|------------|----------|----------|----------|-------------|-------------|-------------|----------|
| 1          | -3.95020 | -0.04155 | -0.16174 | 1.926035    | 1.180851    | 2.8922      | 4.716269 |
| 2          | -3.80767 | 0.048379 | -0.25845 | 1.896522    | 1.094336    | 2.838079    | 4.716269 |
| 3          | -3.14083 | -0.05434 | -0.22777 | 1.925811    | 1.153203    | 2.841426    | 4.465975 |
| 4          | -1.93283 | -0.04922 | -0.18782 | 1.925112    | 1.14442     | 2.838079    | 4.411458 |
| 5          | -5.72512 | -0.03381 | -0.15233 | 2.048158    | 1.463167    | 3.258753    | 6.297163 |
| 6          | -3.17196 | 0.053682 | -0.16565 | 2.032161    | 1.413584    | 3.139477    | 7.158566 |
| 7          | -5.5976  | -0.03571 | -0.12193 | 2.047613    | 1.442135    | 3.314672    | 6.027701 |
| 8          | -3.55278 | 0.002363 | -0.15931 | 2.047952    | 1.449371    | 3.259178    | 6.716049 |
| 9          | -2.81149 | 0.044699 | -0.08466 | 2.032097    | 1.399019    | 3.172670    | 7.853186 |
| 10         | -0.38008 | 0.114342 | -0.18244 | 2.032189    | 1.396213    | 3.144387    | 6.781867 |
| 11         | 2.369722 | 0.000115 | -0.15941 | 2.033125    | 1.517697    | 3.203577    | 7.506173 |
| 12         | 1.505188 | -0.00278 | -0.13892 | 2.032897    | 1.513502    | 3.397291    | 7.130864 |
| 13         | -4.4786  | -0.02114 | -0.17131 | 2.047466    | 1.433013    | 3.193821    | 5.64337  |

|    |          |              |          |          |          |          |              |
|----|----------|--------------|----------|----------|----------|----------|--------------|
|    |          |              |          |          |          |          | 8            |
| 14 | -1.82201 | -0.06844     | -0.19096 | 2.032683 | 1.511198 | 3.386397 | 7.32421<br>2 |
| 15 | -4.53702 | -0.02509     | -0.19042 | 2.045349 | 1.447604 | 3.140539 | 6.04914<br>9 |
| 16 | -5.20679 | -0.03431     | -0.23451 | 2.045644 | 1.447398 | 3.136040 | 6.04914<br>9 |
| 17 | -1.02352 | 0.05207      | -0.10169 | 2.045766 | 1.319193 | 2.958045 | 4.54179      |
| 18 | -1.06878 | 0.06143<br>6 | -0.17716 | 2.042989 | 1.318933 | 2.955129 | 4.60941<br>8 |
| 19 | -4.71081 | -0.04778     | -0.10722 | 2.046918 | 1.461972 | 3.177501 | 5.64446<br>4 |
| 20 | -3.61538 | -0.05888     | -0.14333 | 2.042578 | 1.46212  | 3.177500 | 5.64446<br>4 |
| 21 | -3.58517 | -0.07887     | -0.13466 | 2.055893 | 1.464189 | 3.177524 | 5.64446<br>4 |
| 22 | -3.65806 | -0.07471     | -0.15681 | 2.064214 | 1.475226 | 3.258753 | 6.12345<br>7 |
| 23 | -4.15352 | -0.04259     | -0.15083 | 2.058152 | 1.465346 | 3.258753 | 6.12345<br>7 |
| 24 | -4.10078 | -0.04437     | -0.14094 | 2.054638 | 1.463604 | 3.258753 | 5.87755<br>1 |
| 25 | -3.52711 | -0.08786     | -0.09773 | 2.056829 | 1.464181 | 3.258752 | 6.12345<br>7 |
| 26 | -3.53764 | -0.06853     | -0.13936 | 2.055827 | 1.464209 | 3.187472 | 5.87755<br>1 |
| 27 | -4.8505  | -0.07001     | -0.14291 | 2.056505 | 1.464581 | 3.258753 | 6.29716<br>3 |
| 28 | -4.60756 | -0.09537     | -0.12422 | 2.046544 | 1.461953 | 3.177681 | 5.81421<br>3 |
| 29 | -5.12309 | -0.0947      | -0.14002 | 2.043529 | 1.462612 | 3.177562 | 5.81421<br>3 |
| 30 | -5.26967 | -0.08415     | -0.14542 | 2.052993 | 1.471692 | 3.179297 | 5.81421<br>3 |
| 31 | -5.51165 | -0.08406     | -0.14185 | 2.0469   | 1.464074 | 3.187821 | 6.04914<br>9 |
| 32 | -4.66608 | -0.09464     | -0.14404 | 2.046439 | 1.461943 | 3.177881 | 5.81421<br>3 |
| 33 | -3.82882 | -0.04824     | -0.12863 | 2.089072 | 1.468597 | 3.255969 | 5.64446<br>4 |
| 34 | -4.22443 | -0.04728     | -0.13133 | 2.094364 | 1.472362 | 3.180344 | 5.64446<br>4 |
| 35 | -4.44549 | -0.04341     | -0.12222 | 2.048186 | 1.462417 | 3.197044 | 6.12345<br>7 |
| 36 | -5.1157  | 0.02245<br>5 | -0.21499 | 2.028963 | 1.390646 | 3.136933 | 5.95684      |

|    |          |              |          |          |          |          |              |
|----|----------|--------------|----------|----------|----------|----------|--------------|
| 37 | -6.00225 | 0.01532<br>3 | -0.15575 | 2.028308 | 1.390342 | 3.01493  | 5.71315<br>2 |
| 38 | -4.35888 | -0.09383     | -0.13558 | 2.043795 | 1.462886 | 3.177633 | 5.81421<br>3 |
| 39 | -4.82362 | -0.09894     | -0.12357 | 2.046752 | 1.464969 | 3.187385 | 6.04914<br>9 |
| 40 | -3.71992 | -0.06653     | -0.1415  | 2.086564 | 1.472871 | 3.214962 | 5.64446<br>4 |
| 41 | -5.33839 | -0.04621     | -0.11078 | 2.054323 | 1.471689 | 3.179299 | 5.71315<br>2 |
| 42 | -4.99965 | -0.07626     | -0.12628 | 2.080494 | 1.510711 | 3.229736 | 5.88710<br>9 |
| 43 | -5.06222 | -0.07824     | -0.12505 | 2.082599 | 1.515043 | 3.233094 | 5.88526      |
| 44 | -5.1248  | -0.08022     | -0.12381 | 2.084704 | 1.519375 | 3.236451 | 5.88341      |

Table 2: Description of Molecular Descriptors

| Descriptor | Class | Type                       | Description                                                                           |
|------------|-------|----------------------------|---------------------------------------------------------------------------------------|
| ATSC7p     | 2D    | Autocorrelation            | Centered Broto-Moreau Autocorrelation descriptor of lag 7 weighed by polarizabilities |
| MATS8c     | 2D    | Autocorrelation            | Moran Autocorrelation descriptor of lag 7 weighed by charges                          |
| MATS6i     | 2D    | Autocorrelation            | Moran Autocorrelation descriptor of lag 6 weighed by ionization potential             |
| SpMin2_Bhv | 2D    | Burden Modified Eigenvalue | Burden Matrix of the H-filled molecular graph weighted by volume                      |
| SpMin5_Bhe | 2D    | Burden Modified Eigenvalue | Burden Matrix of the H-filled molecular graph weighted by electronegativities         |
| SpMax8_Bhi | 2D    | Burden Modified Eigenvalue | Burden Matrix of the H-filled molecular graph weighted by first ionization potentials |
| Kier3      | 2D    | Kappa Shape Indices        | Kappa shape index descriptor; describes the importance of molecular topology          |
